# Supplementary material
Source: HighWire-hosted journal article supplement (https://gh.bmj.com/content/5/6/e002425)
Supplement: inline-supplementary-material-1 [file inline-supplementary-material-1.pdf]

Supplementary material

Supplementary box 1. Search Strategy

|                                                                                                                                                                                                                                                                                                                                                                                                                                                                                                                                                                                                                                                                                                                                                                                                                                                                                                                                                                                                                                                                                                                                                                                                                                                                                                                                                                                                                           |
|---------------------------------------------------------------------------------------------------------------------------------------------------------------------------------------------------------------------------------------------------------------------------------------------------------------------------------------------------------------------------------------------------------------------------------------------------------------------------------------------------------------------------------------------------------------------------------------------------------------------------------------------------------------------------------------------------------------------------------------------------------------------------------------------------------------------------------------------------------------------------------------------------------------------------------------------------------------------------------------------------------------------------------------------------------------------------------------------------------------------------------------------------------------------------------------------------------------------------------------------------------------------------------------------------------------------------------------------------------------------------------------------------------------------------|
| <p><i>Theme 1: The Policy</i></p> <p>MeSH terms included: “Financial Support”, “Social Security”, “Disability Insurance”.</p> <p>Keywords included: “Financial Protection”, “Social Protection”, “Safety Net*”, “Social Insurance”, “Unemployment Insurance”, “Injury Insurance”, “Unemployment Benefit*”, “Disability Grant*”, “Cash Benefit*”, “Benefit*”, “*Conditional Cash Transfer”, “UCT”, “Sick* Pay*”, “Paid Sick Leave”, “Wage Compensation”, “Disability Pension*”, “Incapacity Benefit*”, “Continuous Cash Benefit*”, “Guaranteed Minimum Income”, “Basic Income”, “Microfinance”, “Microinsurance”, “Microcredit”.</p> <p><i>Theme 2: The Individual</i></p> <p>MeSH terms included: “Chronic Disease”, “Disease”.</p> <p>Keywords included: “Disab*”, “Sick*”, “Ill*”.</p> <p><i>Theme 3: The Policy Context</i></p> <p>MeSH terms included: “Work”, “Employment”, “Public Policy”.</p> <p>Keywords included: “Labour”, “Labor”, “Employ*”, “Wage*”, “Law*”, “Legal”, “Legislation”, “Policies”, “Worker*”, “Worker Rights”, “Occupation*”, “Private Sector”, “Public Sector”, “Informal”, “Health Shock*”.</p> <p><i>Theme 4: The Setting</i></p> <p>MeSH terms included: “Developing Countries”.</p> <p>Keywords included: “LMIC*”, “LIC*”, “MIC*”, “Low Income Countr*”, “Middle Income Countr*”, “Low and Middle Income Countr*”, “Developing Countr*”, “Third World”, [Individual LMIC Countries].</p> |
|---------------------------------------------------------------------------------------------------------------------------------------------------------------------------------------------------------------------------------------------------------------------------------------------------------------------------------------------------------------------------------------------------------------------------------------------------------------------------------------------------------------------------------------------------------------------------------------------------------------------------------------------------------------------------------------------------------------------------------------------------------------------------------------------------------------------------------------------------------------------------------------------------------------------------------------------------------------------------------------------------------------------------------------------------------------------------------------------------------------------------------------------------------------------------------------------------------------------------------------------------------------------------------------------------------------------------------------------------------------------------------------------------------------------------|

Supplementary Table 1 – see separete file

**Supplementary table 2. Study Characteristics**

|                                |                                                                                                                                                                                                                                                                                                                                                                                                                                                                                                                                                                                                                                                      |
|--------------------------------|------------------------------------------------------------------------------------------------------------------------------------------------------------------------------------------------------------------------------------------------------------------------------------------------------------------------------------------------------------------------------------------------------------------------------------------------------------------------------------------------------------------------------------------------------------------------------------------------------------------------------------------------------|
| Study Types                    | Narrative literature reviews ( <i>n</i> = 14), policy reviews ( <i>n</i> = 7), systematic reviews ( <i>n</i> = 2), cohort studies ( <i>n</i> = 1), observational studies ( <i>n</i> = 1), descriptive studies ( <i>n</i> = 1), randomised controlled trials ( <i>n</i> = 3); cross-sectional studies ( <i>n</i> = 5), case reports ( <i>n</i> = 2), qualitative interviews ( <i>n</i> = 20), quantitative methods (non-specific) ( <i>n</i> = 6), qualitative methods (non-specific) ( <i>n</i> = 3) household surveys ( <i>n</i> = 16), mixed-method studies ( <i>n</i> = 11), opinion pieces ( <i>n</i> = 6) and grey literature ( <i>n</i> = 36). |
| Representation by Income Group | As a mean average, upper-MIC countries were each represented in 3.1 sources, followed by lower-MICs (2.8), and LICs (2).                                                                                                                                                                                                                                                                                                                                                                                                                                                                                                                             |
| Target Populations             | 72 studies focused specifically on the broader concept of long-term ‘disability’, ( <i>n</i> = 72). 20 studies focused on specific illnesses, including HIV/AIDS ( <i>n</i> = 8), tuberculosis ( <i>n</i> = 1) psychiatric conditions ( <i>n</i> = 5), musculoskeletal conditions ( <i>n</i> = 1) and occupational health ( <i>n</i> = 5). 12 studies focused on general short term sick leave ( <i>n</i> = 12). A further 30 focused on both long and short term periods of illness ( <i>n</i> = 30).                                                                                                                                               |
| Programme Type                 | 82 studies focused on non-contributory schemes ( <i>n</i> = 82, 61%). 21 studies focused on contributory schemes ( <i>n</i> = 21, 16%). 24 studies discussed both contributory and non-contributory schemes ( <i>n</i> = 24, 18%). 7 discussed workers rights, without reference to a specific scheme ( <i>n</i> = 7, 5%).                                                                                                                                                                                                                                                                                                                           |

Supplementary Material Table 3. Exclusion Errors: Contributing Factors

|                              | Reason                                                              | Country                                                                                                                         |
|------------------------------|---------------------------------------------------------------------|---------------------------------------------------------------------------------------------------------------------------------|
| Social Exclusion             | Self-stigmatisation or fear of being stigmatised by the community   | China (139), Colombia (81), Malawi (80), Mongolia (160)                                                                         |
|                              | Potential candidates being unaware of their entitlements            | Ghana (141), India (118), South Africa (133), Thailand (66), Uganda (82), Malawi (142)                                          |
|                              | Families choosing to 'hide' disabled individuals from the community | Timor-Leste (131)                                                                                                               |
| Travel to Assessment Centres | Travel costs                                                        | South Africa (100), Vietnam (64)                                                                                                |
|                              | Issues surrounding mobility and physical accessibility              | South Africa (100), Vietnam (64), Brazil (143)                                                                                  |
|                              | Danger travelling to assessments alone                              | South Africa (93, 100, 122)                                                                                                     |
| Assessment Procedure         | Poorly executed assessment criteria/targeting                       | Albania (21), India (124), Palestine (143), Romania (133), Zambia (94), China (103), Palestine (116), Brazil (146), Nepal (147) |
|                              | Poorly organised/unprofessional assessment panels                   | South Africa (100, 102)                                                                                                         |
|                              | A shortage of health assessors and administration staff             | Mozambique (148), Nepal (149), Romania (145), South Africa (133)                                                                |
|                              | Limitations in provider's understanding of the assessment criteria  | Brazil (49), Colombia (69), Mozambique (148), Namibia (150-153), South Africa (27)                                              |
|                              | Lower regard for less visible illnesses                             | South Africa (122, 154), Vietnam (20)                                                                                           |
|                              | Assessor prejudice or bias towards marginalised groups              | Bulgaria (21), India (118), Lesotho (118), Palestine (143), Romania (155), South Africa (27, 122)                               |
|                              | Language barriers between assessors and applicants                  | South Africa (100, 122)                                                                                                         |
| Application Requirements     | Complexity of application process                                   | South Africa (118, 22), Uzbekistan (21)                                                                                         |
|                              | Difficulties obtaining correct documents                            | Bulgaria (21), India (124), Romania (21), South Africa (86, 92, 118), Timor-Leste (131), Uzbekistan (21)                        |
|                              | Time constraints                                                    | Kyrgyzstan (21)                                                                                                                 |
|                              | Cost of applying                                                    | South Africa (86, 100, 156)                                                                                                     |

|                     |                                                                |                                                                                                                                                         |
|---------------------|----------------------------------------------------------------|---------------------------------------------------------------------------------------------------------------------------------------------------------|
| Structural Problems | Programme underfunding                                         | Bangladesh (118), China (104), Ghana (141), India (118), Mozambique (148), Nepal (149); South Africa (101), Zimbabwe (157); Nepal (147); Paraguay (158) |
|                     | A lack of political will in providing adequate support         | China (160), South Africa (101), Zimbabwe (157)                                                                                                         |
|                     | Insufficient analysis of lost opportunity costs due to illness | South Africa (161), Vietnam (106)                                                                                                                       |
|                     | Insufficient administrative capacity                           | South Africa (101, 118), Zimbabwe (163), Nepal (147)                                                                                                    |
|                     | Difficulties reaching nomadic or migrant populations           | China (62, 72, 164, 165), Palestine (144), Philippines (166), Romania (155), Thailand (53), Vietnam (167)                                               |
|                     | Delays in delivering financial support                         | Ghana (141), Nepal (149), Palestine (144), Romania (156), South Africa (100, 133), Zimbabwe (163)                                                       |
|                     | Corruption                                                     | India (118), Mozambique (148), Pakistan (126)                                                                                                           |

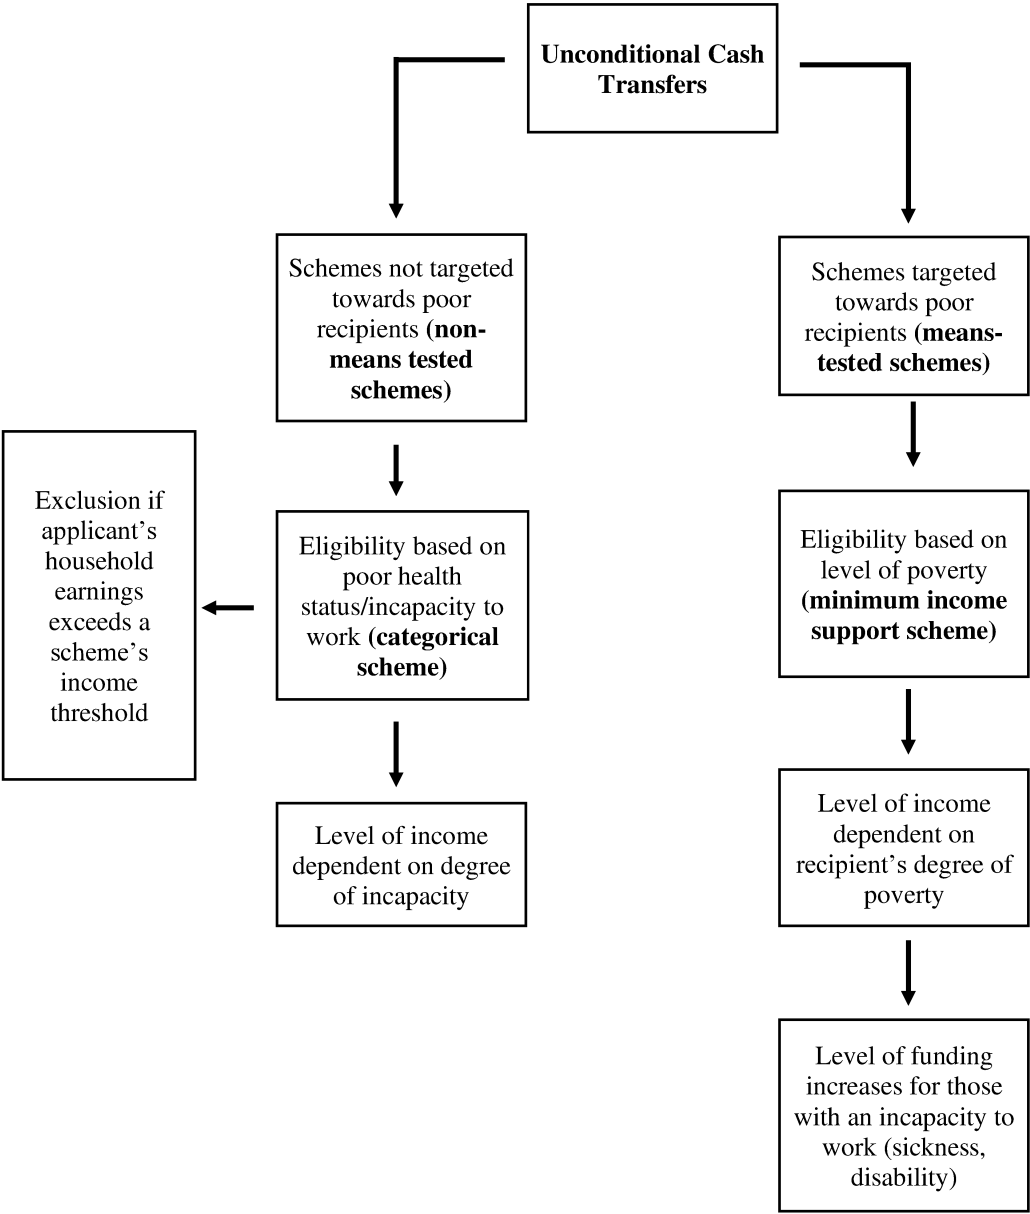

Supplementary figure 1. Mechanisms behind UCT targeting, adapted from the ILO flowchart of social cash transfers (29)
